# Supplementary material for: Langevin dynamics simulation on optimal conditions for large and stable loops of adsorbed homopolymers on substrates
Source: Royal Society of Chemistry journal article supplement (doi:10.1039/d2sm00553k), 2022-01-01
Supplement: d2sm00553k1.pdf [file d2sm00553k1.pdf]

## Supporting Information

Langevin dynamics simulation on the optimal conditions for large and  
stable loops of adsorbed homopolymers on substrate

Rong-Xing Lu<sup>1</sup>, Yun Zhou<sup>1</sup>, Qing-Hui Yang<sup>2</sup>, Jian-Hua Huang<sup>1,\*</sup>

<sup>1</sup> *Department of Chemistry, Zhejiang Sci-Tech University, Hangzhou 310018, China*

<sup>2</sup> *Department of Physics, Hangzhou Dianzi University, Hangzhou 310018, China*

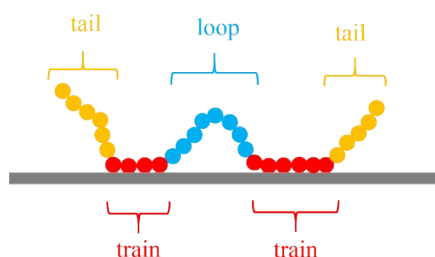

**Fig. S1** Sketch of an adsorbed polymer chain with “train”, “loop”, and “tail”.

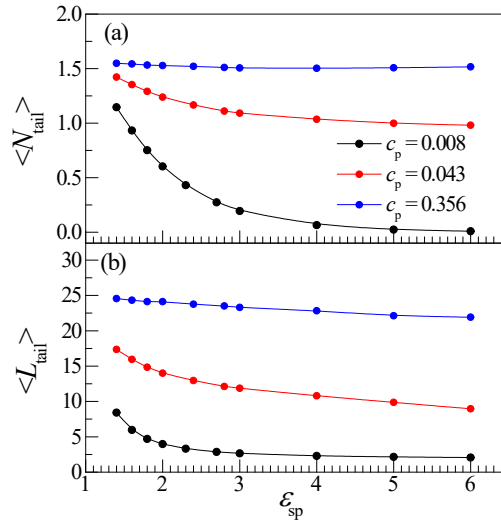

**Fig. S2** Variation of the average number of tails  $\langle N_{\text{tail}} \rangle$  (a) and the average length of tails  $\langle L_{\text{tail}} \rangle$  (b) in each adsorbed chain with the substrate attraction strength  $\epsilon_{\text{sp}}$  for polymers with chain length  $N = 64$  at three concentrations  $c_p = 0.008, 0.043, \text{ and } 0.356$ .

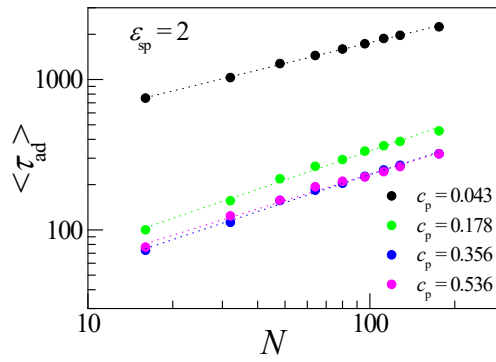

**Fig. S3** Plot of the mean adsorbed time  $\langle \tau_{\text{ad}} \rangle$  as a function of polymer length  $N$  at four concentrations  $c_p = 0.043, 0.178, 0.356 \text{ and } 0.536$  at substrate attraction strength  $\epsilon_{\text{sp}} = 2$ .
